# Supplementary material for: CoFe Prussian blue analogues on 3D porous N-doped carbon nanosheets boost the intercalation kinetics for a high-performance quasi-solid-state hybrid capacitor
Source: Royal Society of Chemistry journal article supplement (doi:10.1039/d2ta03033k), 2022-01-01
Supplement: d2ta03033k1.pdf [file d2ta03033k1.pdf]

Electronic Supplementary Information for

## **CoFe Prussian Blue Analogues on 3D Porous N-doped Carbon Nanosheet Boost the Intercalation Kinetics for High-Performance Quasi-Solid-State Hybrid Capacitor**

*Juhyung Choi,<sup>a,‡</sup> Jiho Lim,<sup>a,‡</sup> Daekyu Kim,<sup>b</sup> Sumin Park,<sup>a</sup> Bingyi Yan,<sup>a</sup> Dongjin Ko,<sup>a</sup> Youngseul Cho,<sup>a</sup> Lawrence Yoon Suk Lee,<sup>b,\*</sup> and Yuanzhe Piao<sup>a,c,\*</sup>*

<sup>a</sup> Department of Transdisciplinary Studies, Graduate School of Convergence Science and Technology, Seoul National University, 145 Gwanggyo-ro, Yeongtong-gu, Suwon-si, Gyeonggi-do, 16229, Republic of Korea

<sup>b</sup> Department of Applied Biology and Chemical Technology and Research Institute for Smart Energy, The Hong Kong Polytechnic University, Hung Hom, Kowloon, Hong Kong SAR, China

<sup>c</sup> Advanced Institutes of Convergence Technology, 145 Gwanggyo-ro, Yeongtong-gu, Suwon-si, Gyeonggi-do, 16229, Republic of Korea

‡ These authors equally contributed to this work.

**Corresponding authors:** lawrence.ys.lee@polyu.edu.hk (L.Y.S. Lee); parkat9@snu.ac.kr (Y. Piao).

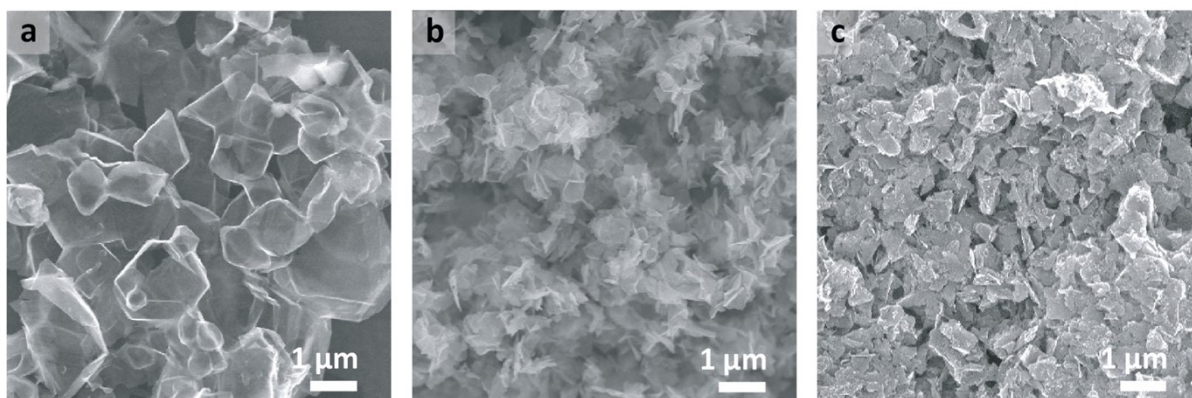

**Fig. S1.** SEM images of (a) IPC, (b) IPNC, and (c) CoFe PBA/IPNC.

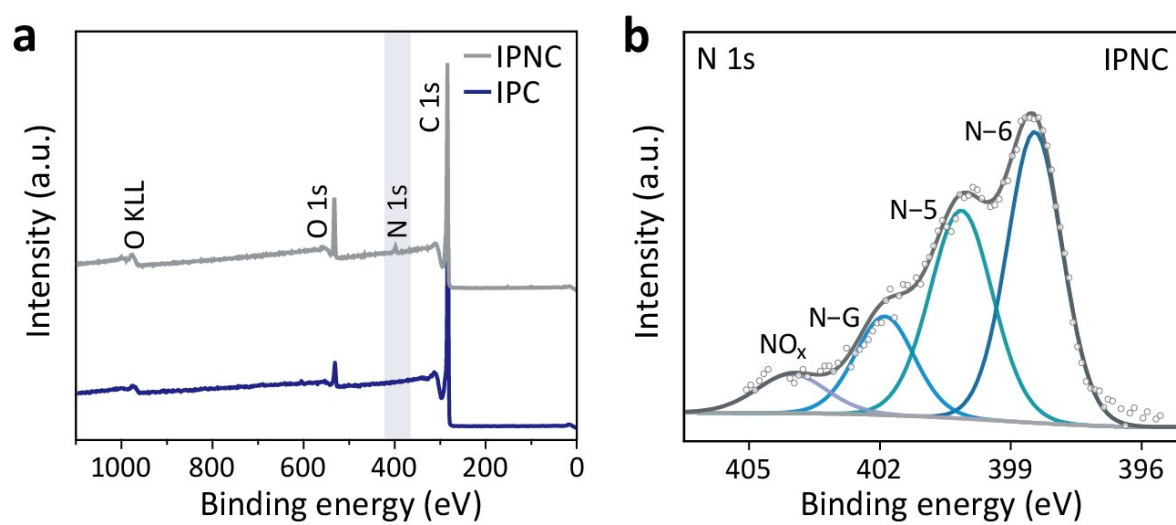

**Fig. S2.** (a) XPS survey spectra of IPNC and IPC and (b) high-resolution N 1s spectrum of IPNC.

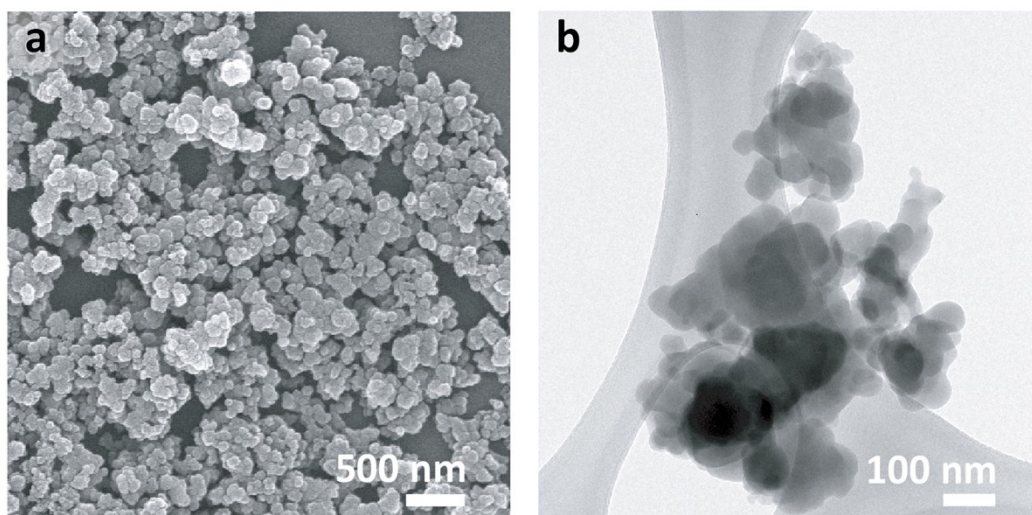

**Fig. S3.** (a) SEM and (b) TEM image of CoFe PBA nanoparticles.

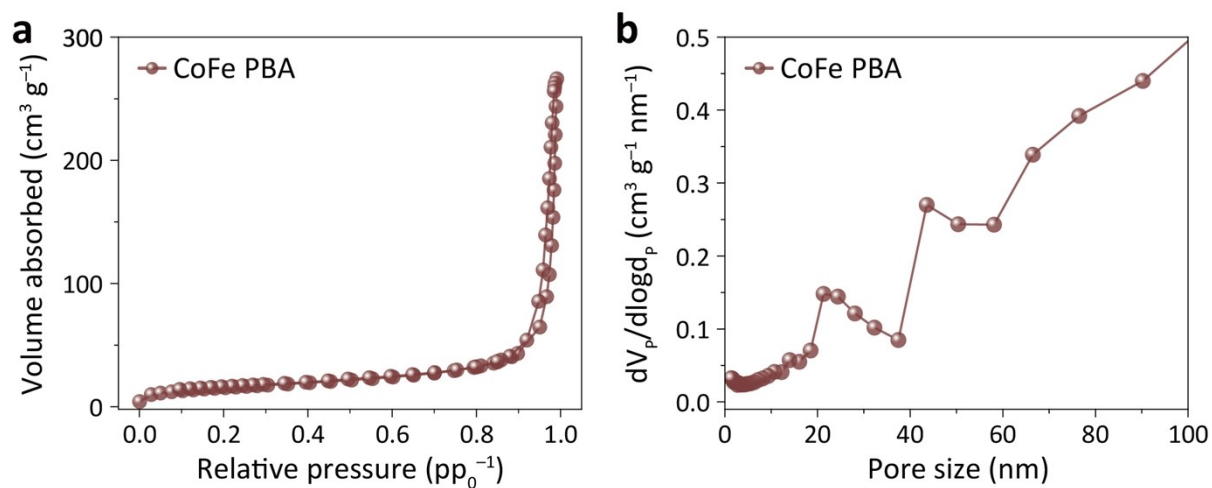

**Fig. S4.** (a) N<sub>2</sub> adsorption–desorption isotherms and (b) size distribution of CoFe PBA obtained using the Barrett–Joyner–Halenda (BJH) method.

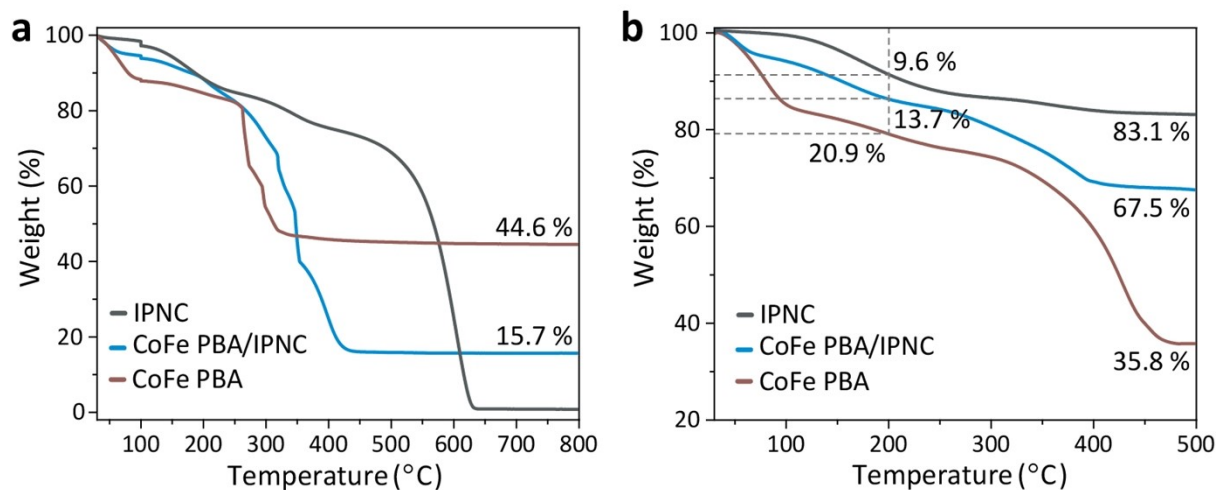

**Fig. S5.** Thermal gravimetric analysis (TGA) curves of IPNC, CoFe PBA/IPNC, and CoFe PBA obtained under (a) air and (b) Ar atmosphere at a ramping rate of  $10\text{ }^{\circ}\text{C min}^{-1}$ .

According to the TGA analysis in the air atmosphere, the remaining mass percentage is 44.6, 15.7, and 0 % for CoFe PBA, CoFe PBA/IPNC, and IPNC, respectively (**Fig. S5a**). Assuming the complete conversions of CoFe PBA to  $\text{CoFe}_2\text{O}_4$  and IPNC to  $\text{CO}_2$ , the mass percentage of CoFe PBA in the CoFe PBA/IPNC can be estimated as 35.2 %.

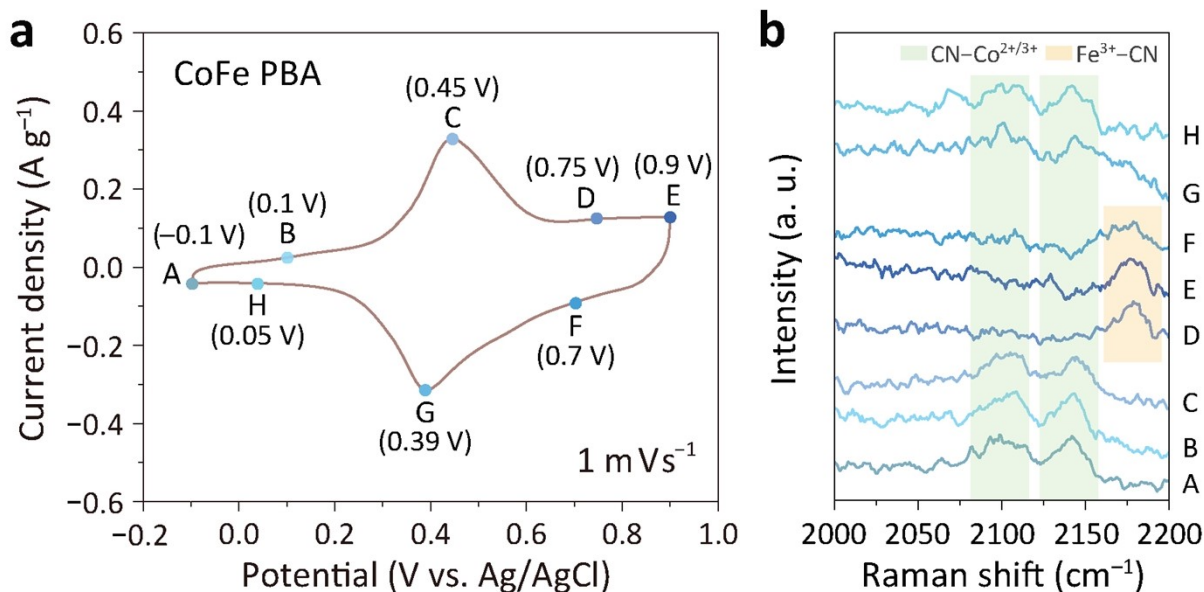

**Fig. S6.** (a) CV curve and (b) the related *in situ* Raman spectra of CoFe PBA at various applied potentials.

To better understand the energy storage mechanism in CoFe PBA, we have conducted *in situ* Raman spectroelectrochemical analysis with potential cycling between  $-0.1$  and  $0.9$  V after the activation process in  $0.5$  M  $\text{Na}_2\text{SO}_4$  electrolyte (**Fig. S6a**). The Raman spectra of CoFe PBA acquired at various applied potentials (**Fig. S6b**) exhibit the characteristic bands related to the two  $\text{Na}^+$  intercalation/deintercalation processes that can be explained by the following equations:

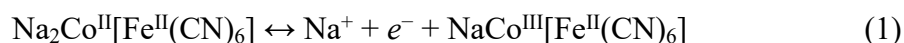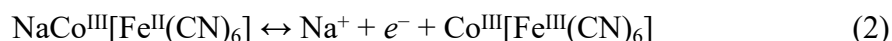

When the voltage is applied in the anodic direction from  $-0.1$  to  $0.45$  V (marked as A  $\rightarrow$  C), two broad peaks that correspond to the valence states of the N-coordinated  $\text{Co}^{2+/3+}$  species are observed at *ca.*  $2,106$  and  $2,142$   $\text{cm}^{-1}$  (**Fig. S6b**, Eq (1)).<sup>S1,2</sup> Another peak assigned to the C-coordinated  $\text{Fe}^{3+}$  species appears at *ca.*  $2,180$   $\text{cm}^{-1}$  in the high-potential region ( $0.75$  and  $0.9$  V, marked as D  $\rightarrow$  E) while the peaks for CN-Co species are suppressed (Eq. (2)).<sup>S2</sup> During the cathodic sweep from  $0.7$  to  $0.05$  V (F  $\rightarrow$  H), the  $\text{Fe}^{3+}$ -CN band vanishes and the CN-Co bands re-emerges. This supports the reversible redox reactions on CoFe PBA.

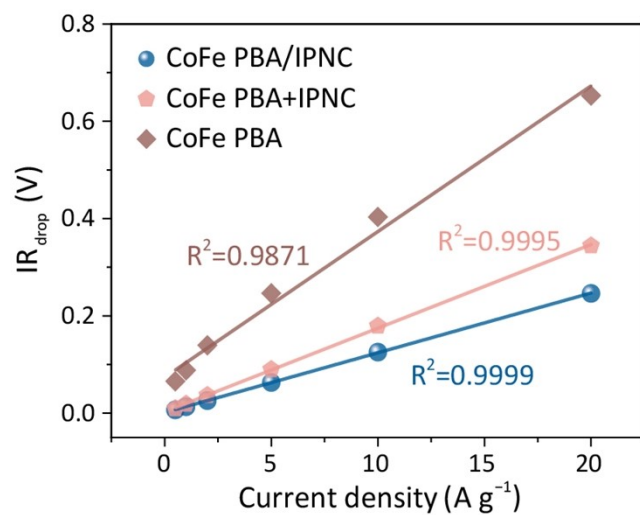

**Fig. S7.** Voltage drop ( $iR$  drop) of CoFe PBA/IPNC, CoFe PBA+IPNC, and CoFe PBA plotted as a function of current density from 0.5 to 20 A g<sup>-1</sup>.

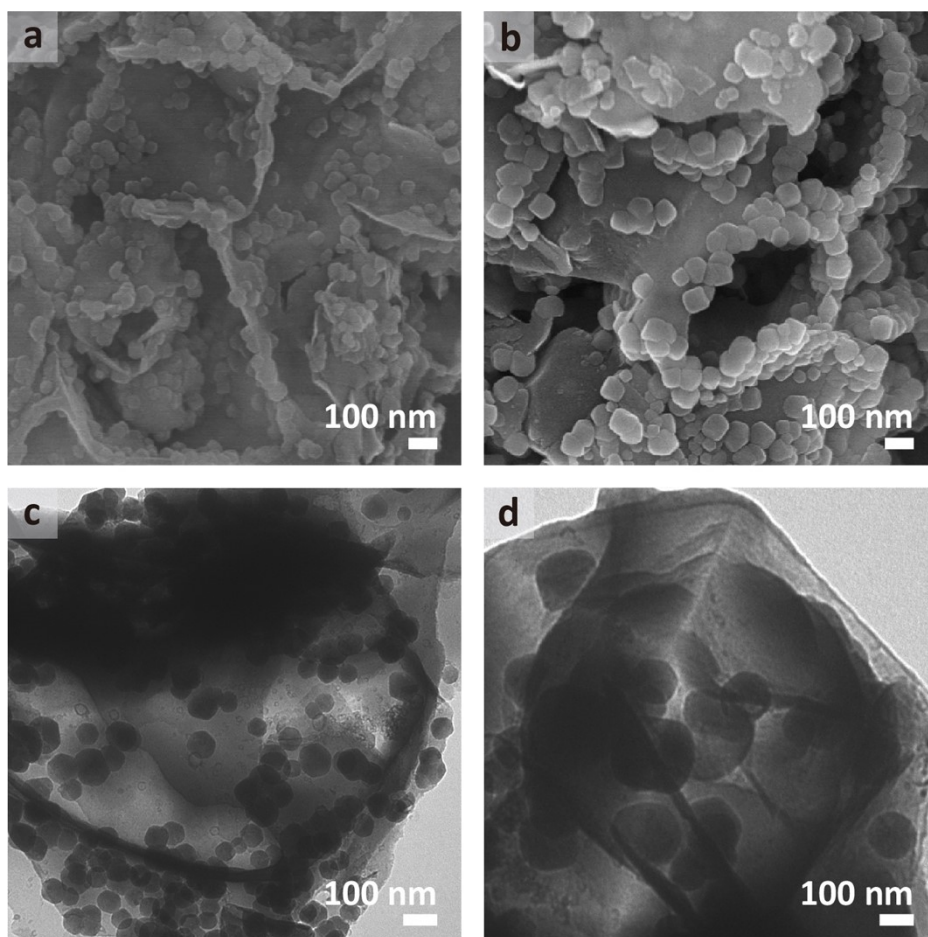

**Fig. S8.** SEM and TEM images of (a, c) CoFe PBA/IPNC-C1 and (b, d) CoFe PBA/IPNC-C2, respectively.



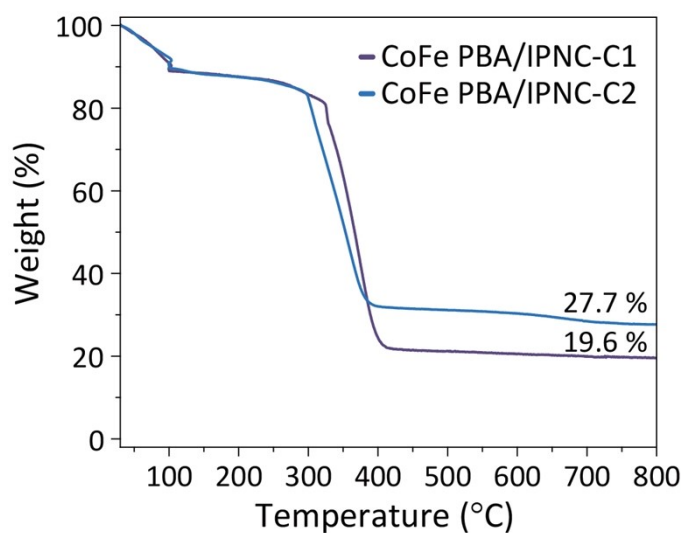

**Fig. S9.** Thermal gravimetric analysis (TGA) curves of CoFe PBA/IPNC-C1 and CoFe PBA-C2 obtained under an air atmosphere at a ramping rate of  $10\text{ }^{\circ}\text{C min}^{-1}$ .

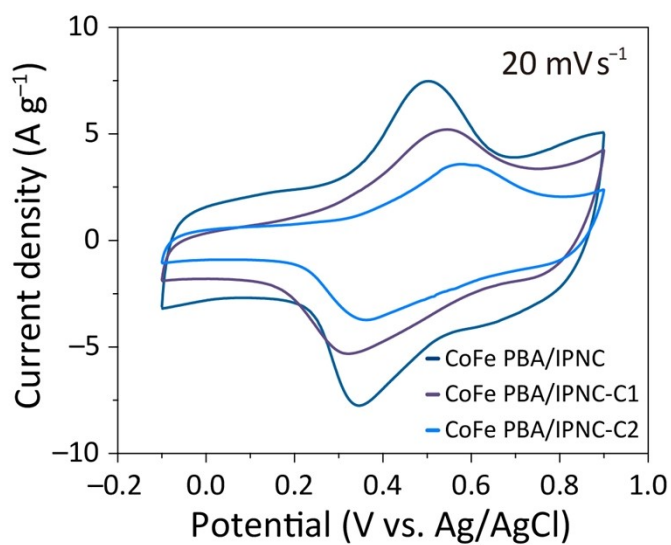

**Fig. S10.** CV curves of CoFe PBA/IPNC, CoFe PBA/IPNC-C1, and CoFe PBA/IPNC-C2 at a scan rate of  $20\text{ mV s}^{-1}$ .

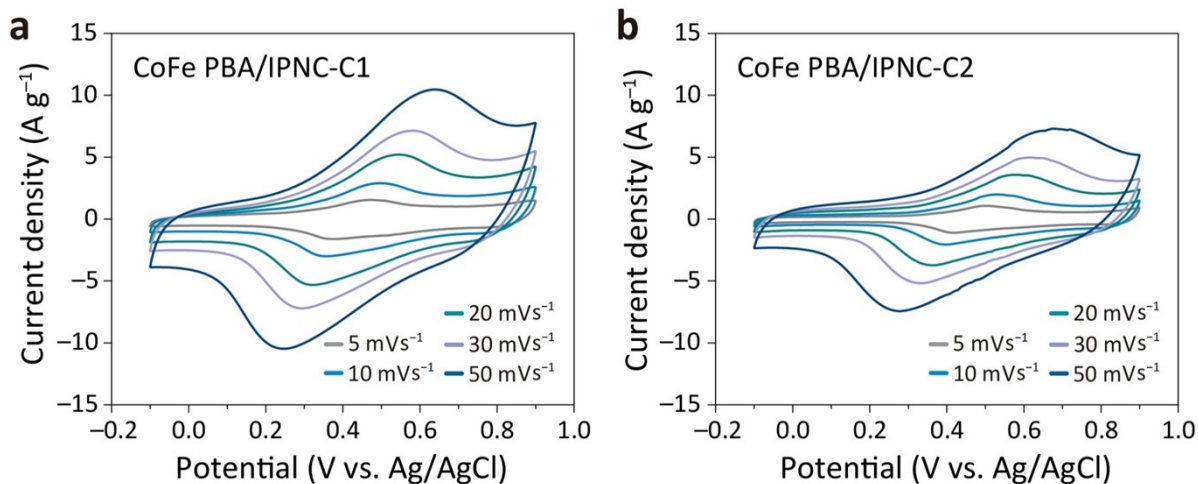

**Fig. S11.** CV curves of (a) CoFe PBA/IPNC-C1 and (b) CoFe PBA/IPNC-C2 at the various scan rates from 5 to 50 mV s<sup>-1</sup>.

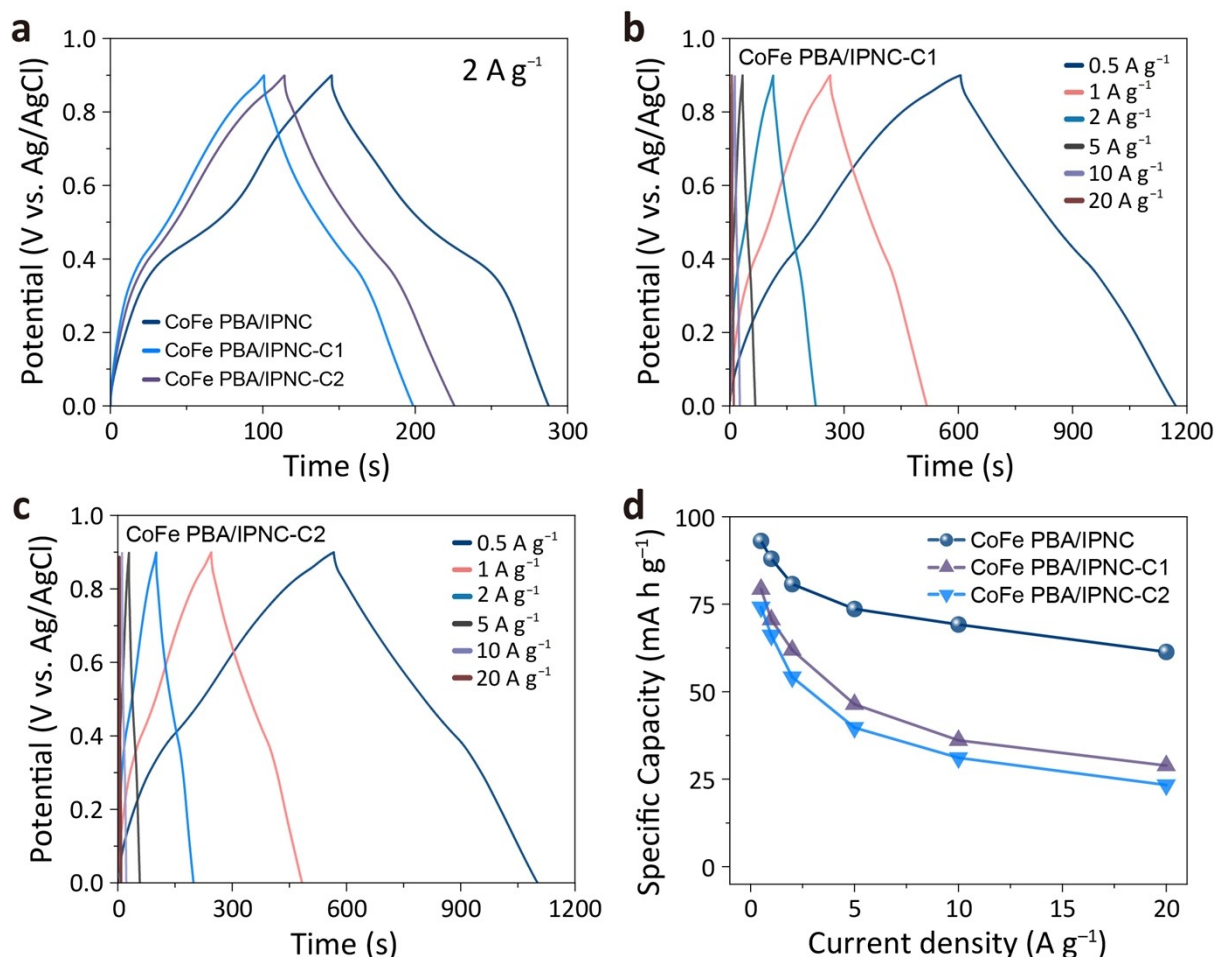

**Fig. S12.** (a) GCD profiles of CoFe PBA/IPNC, CoFe PBA/IPNC-C1, and CoFe PBA/IPNC-C2 at a current density of 2 A g<sup>-1</sup>. GCD profiles of (b) CoFe PBA/IPNC-C1 and (c) CoFe PBA/IPNC-C2 at the different current densities range from 0.5 to 20 A g<sup>-1</sup> and (d) the corresponding rate capabilities of CoFe PBA/IPNC, CoFe PBA/IPNC-C1, and CoFe PBA/IPNC-C2.



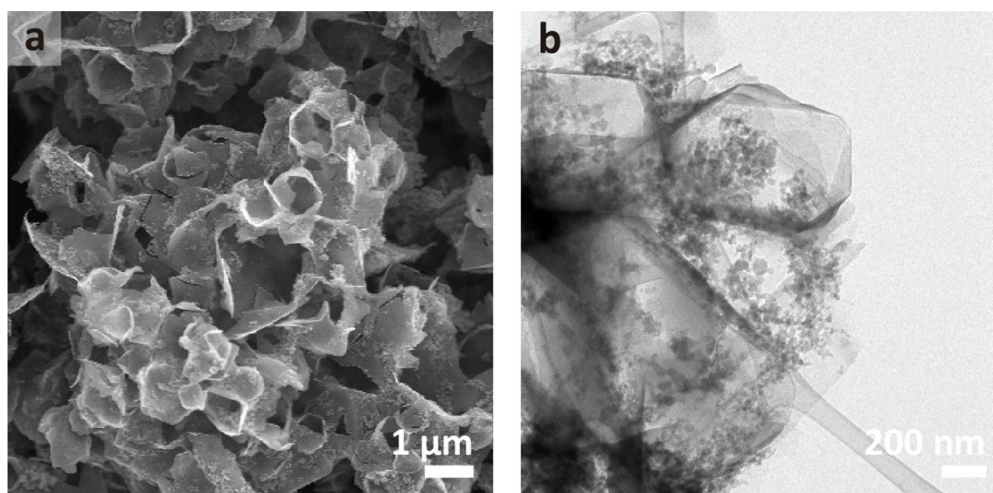

**Fig. S13.** (a) SEM and (b) TEM images of CoFe PBA/IPC.

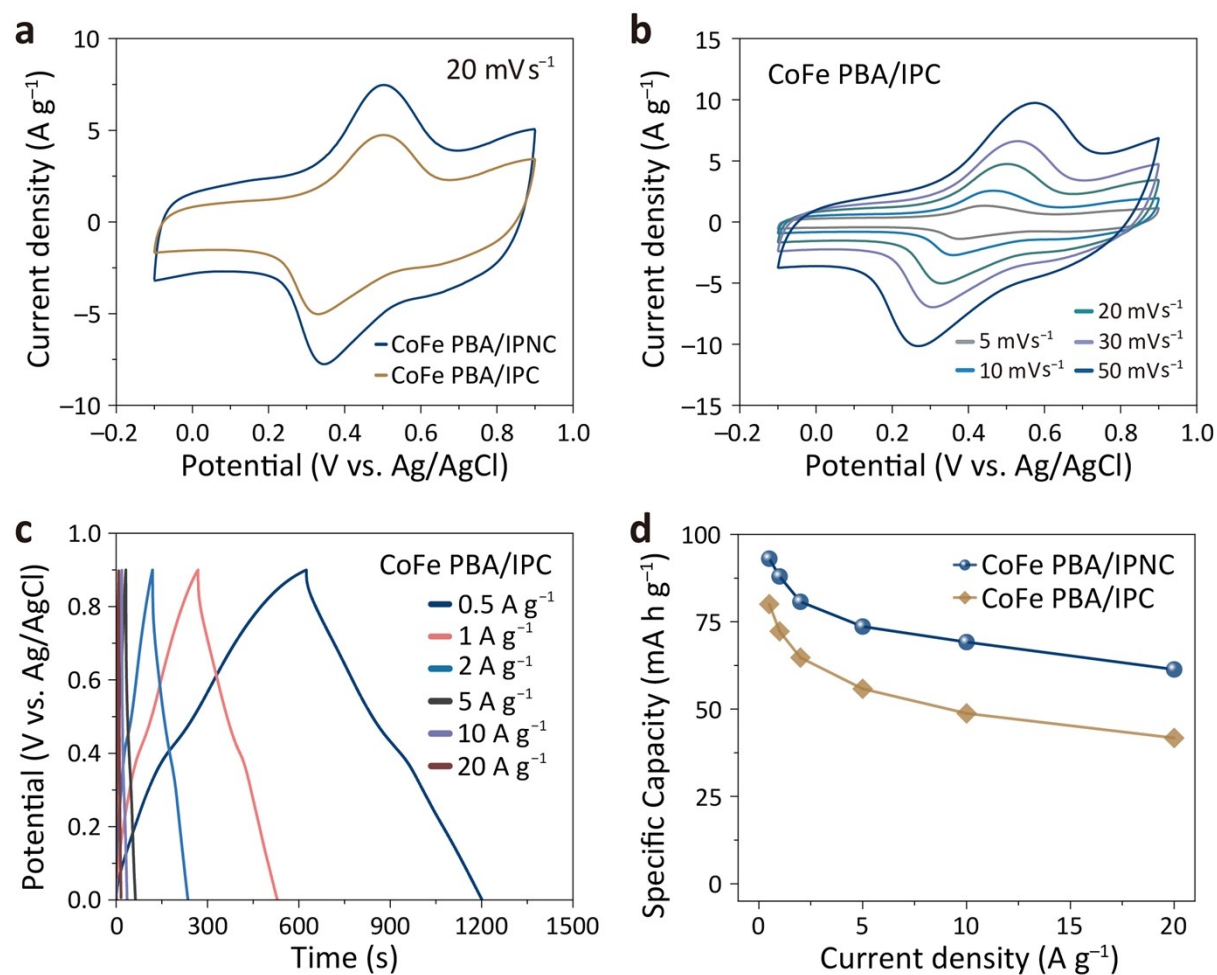

**Fig. S14.** (a) CV curves of CoFe PBA/IPNC and CoFe PBA/IPC at a scan rate of  $20 \text{ mV s}^{-1}$ . (b) CV curves of CoFe PBA/IPC at the different scan rates range from  $5$  to  $50 \text{ mV s}^{-1}$ . (c) GCD profiles of CoFe PBA/IPC at the different current densities range from  $0.5$  to  $20 \text{ A g}^{-1}$  and (d) the corresponding rate capabilities of CoFe PBA/IPC.

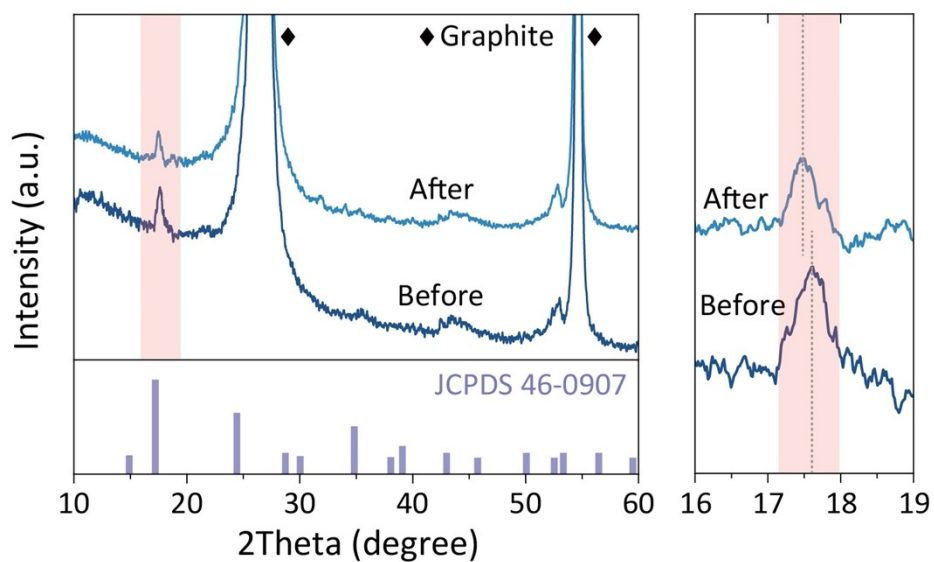

**Fig. S15.** XRD pattern of CoFe PBA/IPNC before and after 5,000 cycles.

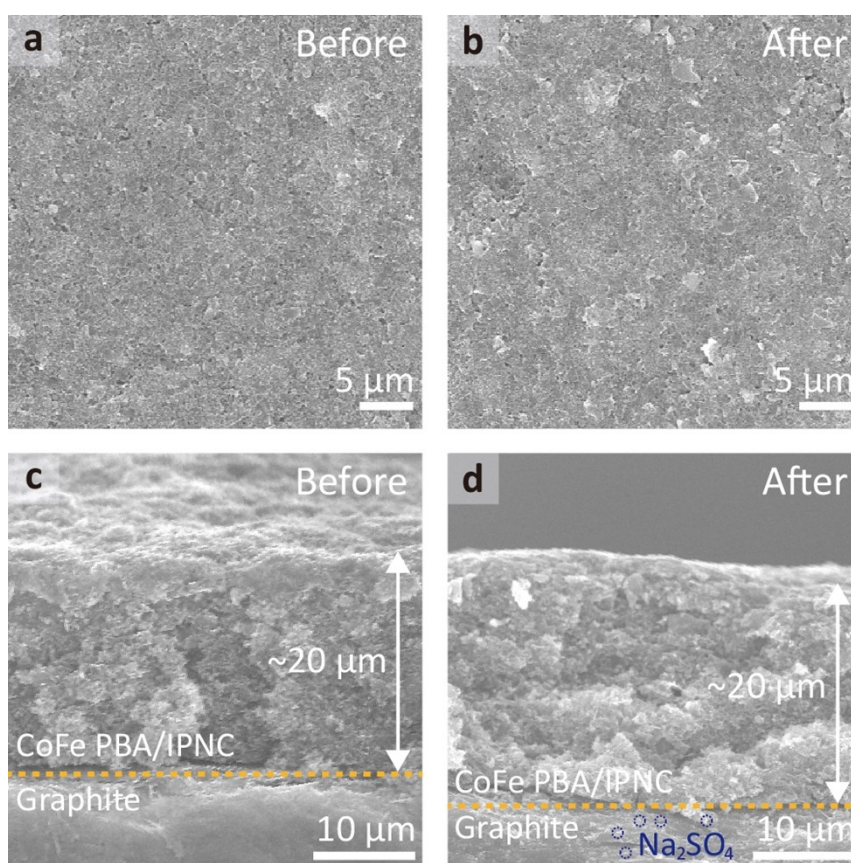

**Fig. S16.** (a, b) Top view and (c, d) cross-section of SEM images of CoFe PBA/IPNC electrode before and after 5,000 cycles.

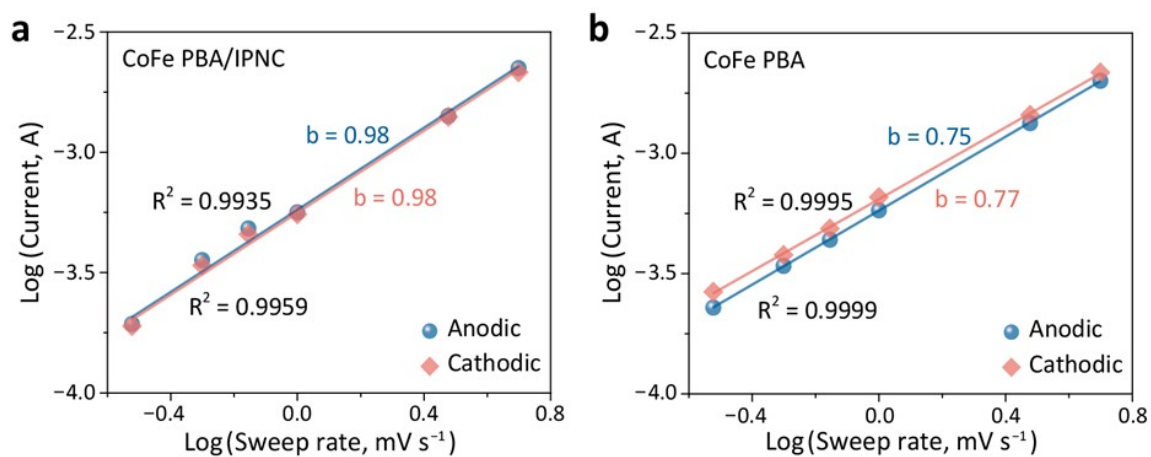

**Fig. S17.** Linear relationship between the redox peak current ( $i$ ) and the scan rate ( $v$ ) of (a) CoFe PBA/IPNC and (b) CoFe PBA electrodes.

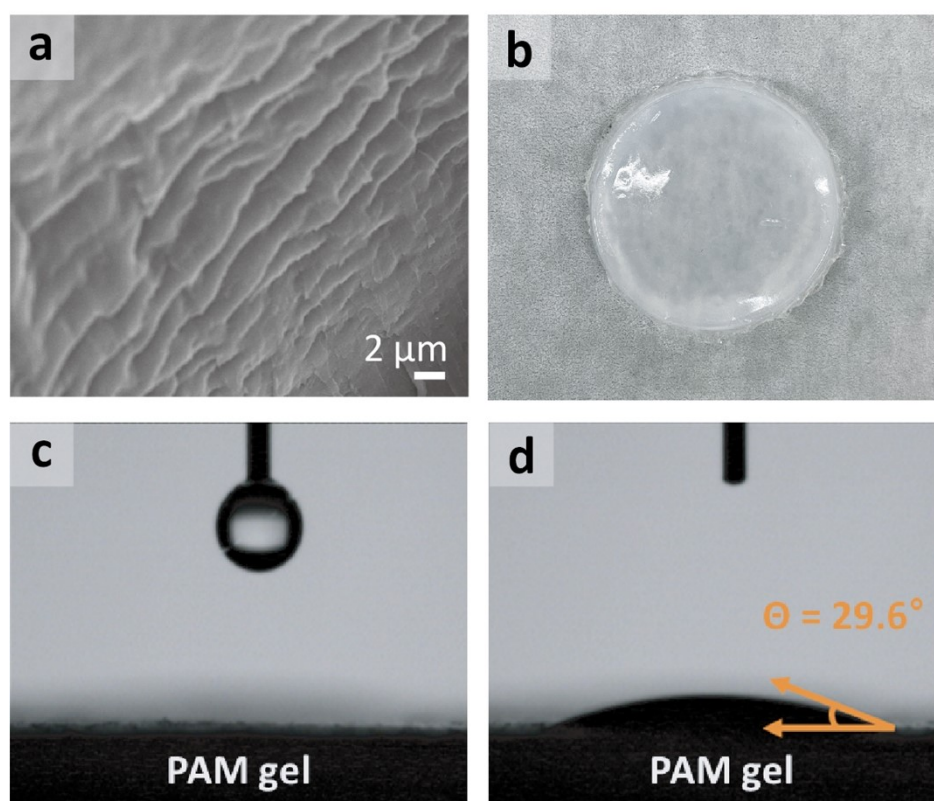

**Fig. S18.** (a) SEM image and (b) digital photo of PAM gel. (c, d) Water contact angle on the PAM gel substrate.

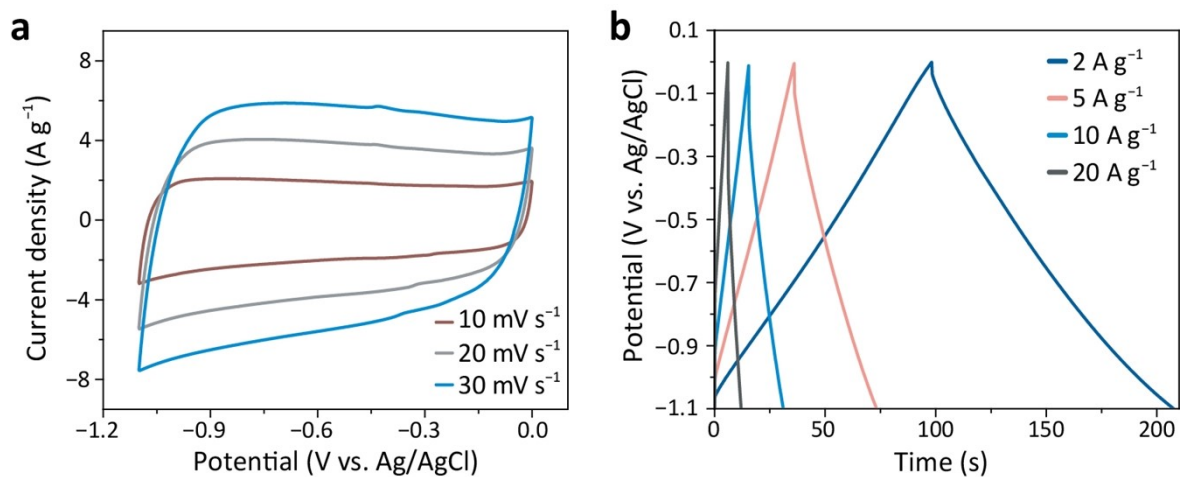

**Fig. S19.** (a) CV and (b) GCD curves of IPNC obtained in the voltage range of the negative electrode.

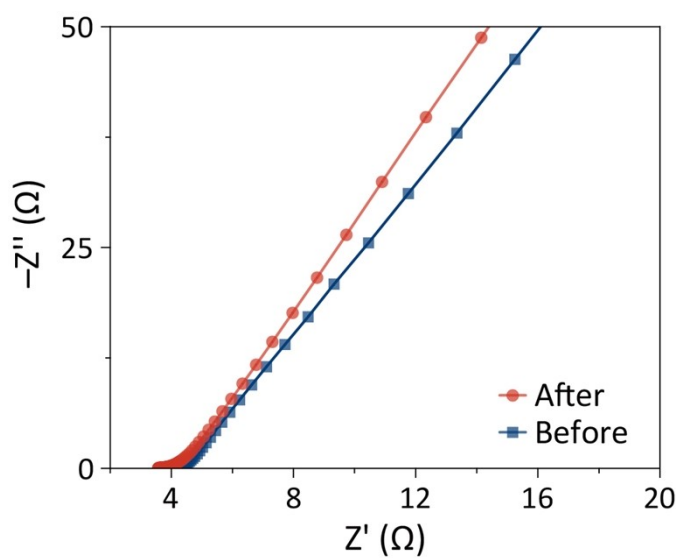

**Fig. S20.** EIS plots of full-device based on a gel electrolyte before and after the cycle test.



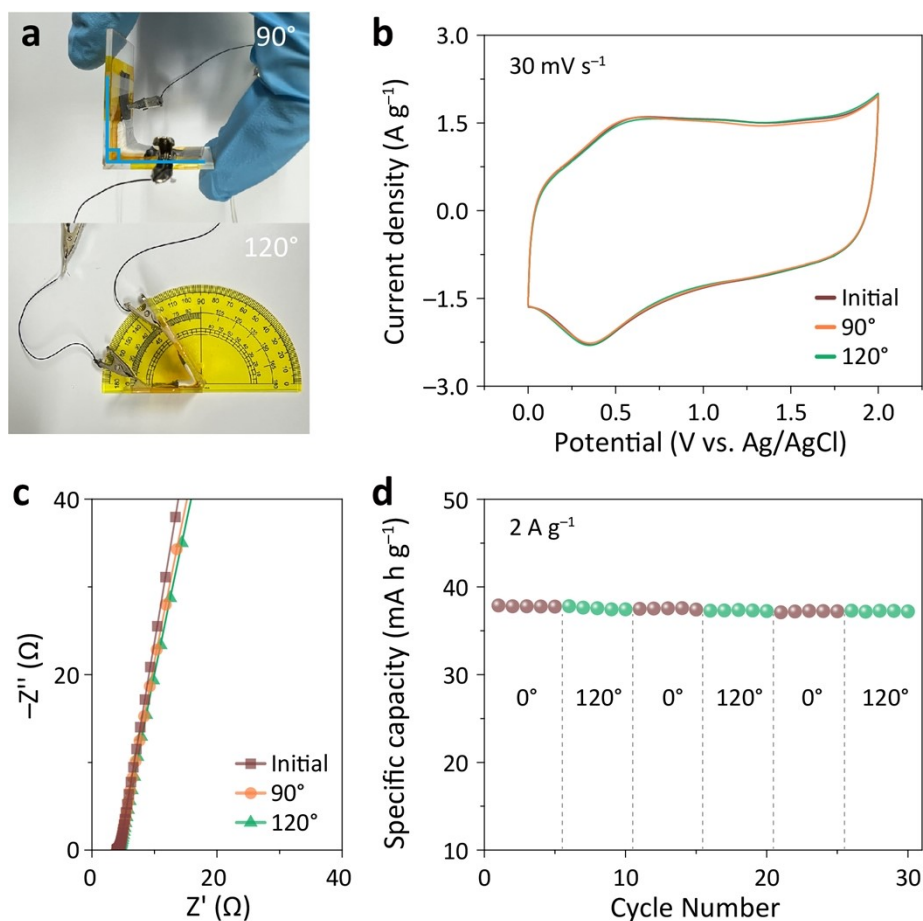

**Fig. S21.** (a) Photographs of the bent full-device (top:  $90^\circ$  and bottom:  $120^\circ$ ). (b) CV curves of the full-device at a scan rate of  $30 \text{ mV s}^{-1}$  and (c) EIS plots obtained at different bending angles ( $0$  to  $120^\circ$ ). (d) Capacities of the full-device under the switching mechanical conditions.

**Table S1.** Elemental analysis of IPC and IPNC.

| Sample | Elemental composition (wt.%) |     |     |     |
|--------|------------------------------|-----|-----|-----|
|        | C                            | N   | O   | H   |
| IPC    | 92.4                         | 0   | 6.9 | 0.7 |
| IPNC   | 90.4                         | 4.5 | 4.3 | 0.8 |

**Table S2.** ICP analysis of CoFe PBA/IPNC and CoFe PBA.

| Sample        | Concentration of elements (ppm) |      |     |
|---------------|---------------------------------|------|-----|
|               | K                               | Co   | Fe  |
| CoFe PBA/IPNC | 0.6                             | 14.9 | 9.5 |
| CoFe PBA      | 0.4                             | 7    | 4.6 |

**Table S3.** Summary of the parameters used for EIS data analysis.

| Sample        | $R_s$ ( $\Omega$ ) | $R_{ct}$ ( $\Omega$ ) | $W$ ( $\Omega s^{-1/2}$ ) | CPE (F)                | C (F)                   |
|---------------|--------------------|-----------------------|---------------------------|------------------------|-------------------------|
| CoFe PBA/IPNC | 4.77               | 3.22                  | $429.83 \times 10^{-3}$   | $50.73 \times 10^{-6}$ | $206.88 \times 10^{-3}$ |
| CoFePBA+IPNC  | 5.93               | 7.83                  | $217.27 \times 10^{-3}$   | $27.74 \times 10^{-6}$ | $169.57 \times 10^{-3}$ |
| CoFe PBA      | 7.42               | 51.25                 | $2.89 \times 10^{-3}$     | $41.76 \times 10^{-6}$ | $625.6 \times 10^{-6}$  |



**Table S4.** Supercapacitor performances of CoFe PBA/IPNC electrode in comparison with recently reported electrodes (in 0.5 M Na<sub>2</sub>SO<sub>4</sub>).

| Electrode                                                  | Three-Electrode           |                                                                                 |                | Hybrid capacitor                               |                                                 | Ref.             |
|------------------------------------------------------------|---------------------------|---------------------------------------------------------------------------------|----------------|------------------------------------------------|-------------------------------------------------|------------------|
|                                                            | Potential (V vs. Ag/AgCl) | Specific capacity (Q <sub>s</sub> ) or capacitance (C <sub>s</sub> )            | Voltage (V)    | $E_{\max}$ (Wh kg <sup>-1</sup> )              | $P_{\max}$ (kW kg <sup>-1</sup> )               |                  |
| PB/rGO <sup>†</sup>                                        | -0.2 – 1                  | 286 F g <sup>-1</sup> at 0.3 A g <sup>-1</sup>                                  | 0 – 2.0        | 45.4<br>(0.28 kW kg <sup>-1</sup> )            | 20.1<br>(18.2 Wh kg <sup>-1</sup> )             | [S3]             |
| Hollow CoHCF                                               | 0 – 1                     | 292 F g <sup>-1</sup> at 0.5A g <sup>-1</sup>                                   | 0 – 2.0        | 42.5<br>(0.99 kW kg <sup>-1</sup> )            | 21.1<br>(13.5 Wh kg <sup>-1</sup> )             | [S4]             |
| CoHCF//mRGO                                                | -0.1 – 1.1                | 250 F g <sup>-1</sup> at 1A g <sup>-1</sup>                                     | 0 – 2.4        | 34.4<br>(2.5 kW kg <sup>-1</sup> )             | 25<br>(6.7 Wh kg <sup>-1</sup> )                | [S5]             |
| rGO-NiHCF//SGC                                             | 0 – 0.8                   | 294 F g <sup>-1</sup> at 2 mV s <sup>-1</sup>                                   | 0 – 1.8        | 25.4<br>(0.6 kW kg <sup>-1</sup> )             | 12<br>(7 Wh kg <sup>-1</sup> )                  | [S6]             |
| CoHCF/rGO//AC                                              | -0.1 – 1                  | 340 F g <sup>-1</sup> at 1A g <sup>-1</sup>                                     | 0 – 2.0        | 39.6<br>(1 kW kg <sup>-1</sup> )               | 20<br>(1 Wh kg <sup>-1</sup> )                  | [S7]             |
| MnHCF//Fe <sub>3</sub> O <sub>4</sub> /rGO <sup>†</sup>    | 0 – 0.8                   | 238 F g <sup>-1</sup> at 1 mA cm <sup>-2</sup>                                  | 0 – 1.8        | 43.2<br>(0.27 kW kg <sup>-1</sup> )            | 2.18<br>(27.9 Wh kg <sup>-1</sup> )             | [S8]             |
| MnO <sub>2</sub> @CNT <sup>†</sup> //MnO <sub>3</sub> @CNT | -0.1 – 0.9                | 337 F g <sup>-1</sup> at 1 mV s <sup>-1</sup>                                   | 0 – 2.0        | 27.8<br>(0.52 kW kg <sup>-1</sup> )            | 9.8<br>(10 Wh kg <sup>-1</sup> )                | [S9]             |
| MnO <sub>2</sub> /HCNFs                                    | 0 – 1                     | 293.6 F g <sup>-1</sup> at 0.5A g <sup>-1</sup>                                 | 0 – 2.0        | 35.1<br>(0.5 kW kg <sup>-1</sup> )             | 8.78<br>(16.1 Wh kg <sup>-1</sup> )             | [S10]            |
| High-entropy PBA <sup>†</sup>                              | -0.2 – 1.0                | 175 F g <sup>-1</sup> at 5 mV s <sup>-1</sup>                                   | -              | -                                              | -                                               | [S11]            |
| CoHCF <sup>†</sup>                                         | 0 – 1<br>(vs. SCE)        | 112 mAh g <sup>-1</sup> at 0.5 C                                                | -              | -                                              | -                                               | [S12]            |
| PB/MnO <sub>2</sub>                                        | 0 – 0.8                   | 623 F g <sup>-1</sup> at 5 mV s <sup>-1</sup>                                   | -              | -                                              | -                                               | [S13]            |
| <b>CoFe PBA/IPNC//IPNC</b>                                 | <b>0 – 0.9</b>            | <b>93.1 mAh g<sup>-1</sup> (372.2 F g<sup>-1</sup>) at 0.5 A g<sup>-1</sup></b> | <b>0 – 2.0</b> | <b>42.9</b><br><b>(0.4 kW kg<sup>-1</sup>)</b> | <b>14.6</b><br><b>(15.5 Wh kg<sup>-1</sup>)</b> | <b>This work</b> |

<sup>†</sup> 1 M Na<sub>2</sub>SO<sub>4</sub> was used as the electrolyte.

## References

- [S1] H. Yang, J. Liu, Z. Chen, R. Wang, B. Fei, H. Liu, Y. Guo, R. Wu, *Chem. Eng. J.*, 2021, **420**, 127671.
- [S2] R. Mažeikienė, G. Niaura, A. Malinauskas, *J. Electroanal. Chem.*, 2014, **719**, 60-71.
- [S3] J. G. Wang, L. Ren, Z. Hou, M. Shao, *Chem. Eng. J.*, 2020, **397**, 125521.
- [S4] J. G. Wang, Z. Zhang, X. Zhang, X. Yin, X. Li, X. Liu, F. Kang, B. Wei, *Nano Energy*, 2017, **39**, 647-653.
- [S5] F. Zhao, Y. Wang, X. Xu, Y. Liu, R. Song, G. Lu, Y. Li, *ACS Appl. Mater. Interfaces*, 2014, **6**, 11007-11012.
- [S6] Q. Zhou, T. Wei, Z. Liu, L. Zhang, B. Yuan, Z. Fan, *Electrochim. Acta*, 2019, **303**, 40-48.
- [S7] J. G. Wang, Z. Zhang, X. Liu, B. Wei, *Electrochim. Acta*, 2017, **235**, 114-121.
- [S8] K. Lu, D. Li, X. Gao, H. Dai, N. Wang, H. Ma, *J. Mater. Chem. A*, 2015, **3**, 1613-1619.
- [S9] T. H. Lee, D. T. Pham, R. Sahoo, J. Seok, T. H. T. Luu, Y. H. Lee, *Energy Storage Mater.*, 2018, **12**, 223-231.
- [S10] P. Zhao, M. Yao, H. Ren, N. Wang, S. Komarneni, *Appl. Surf. Sci.* 2019, **463**, 931-938.
- [S11] W. Jiang, T. Wang, H. Chen, X. Suo, J. Liang, W. Zhu, H. Li, S. Dai, *Nano Energy*, 2021, **79**, 105464.
- [S12] T. Shao, C. Li, C. Liu, W. Deng, W. Wang, M. Xue, R. Li, *J. Mater. Chem. A*, 2019, **7**, 1749-1755.
- [S13] X. Jin, S. Y. Son, M. G. Kim, S. J. Hwang, *Nano Energy*, 2020, **78**, 105255.
